# 1 Engineered Trimeric ACE2 Binds and Locks “Three-up” Spike Protein to Potently Inhibit 2 SARS-CoVs and Mutants

3  
4 Liang Guo<sup>1,2†</sup>, Wenwen Bi<sup>1,2†</sup>, Xinling Wang<sup>3†</sup>, Wei Xu<sup>3†</sup>, Renhong Yan<sup>1,2†</sup>, Yuanyuan  
5 Zhang<sup>1,2†</sup>, Kai Zhao<sup>1,2</sup>, Yaning Li<sup>1,2</sup>, Mingfeng Zhang<sup>1,2</sup>, Xingyue Bao<sup>1,2</sup>, Xia Cai<sup>3</sup>, Yutang Li<sup>3</sup>,  
6 Di Qu<sup>3</sup>, Shibo Jiang<sup>3</sup>, Youhua Xie<sup>3\*</sup>, Qiang Zhou<sup>1,2\*</sup>, Lu Lu<sup>3\*</sup>, Bobo Dang<sup>1,2\*</sup>

7  
8 <sup>1</sup>Center for Infectious Disease Research, Zhejiang Provincial Laboratory of Life Sciences and  
9 Biomedicine, Key Laboratory of Structural Biology of Zhejiang Province, School of Life  
10 Sciences, Westlake University, Hangzhou, Zhejiang, China.

11 <sup>2</sup>Institute of Biology, Westlake Institute for Advanced Study, Hangzhou, Zhejiang Province,  
12 China.

13 <sup>3</sup>Key Laboratory of Medical Molecular Virology (MOE/NHC/CAMS), School of Basic Medical  
14 Sciences and Biosafety Level 3 Laboratory, Fudan University, Shanghai 200032, China.

15  
16 †These authors contributed equally to this work.

17 \*Correspondence to: yhxie@fudan.edu.cn, zhouqiang@westlake.edu.cn, lul@fudan.edu.cn,  
18 dangbobo@westlake.edu.cn

19  
20 **Abstract:** SARS-CoV-2 enters cells via ACE-2, which binds the spike protein with moderate  
21 affinity. Despite a constant background mutational rate, the virus must retain binding with ACE2  
22 for infectivity, providing a conserved constraint for SARS-CoV-2 inhibitors. To prevent  
23 mutational escape of SARS-CoV-2 and to prepare for future related coronavirus outbreaks, we  
24 engineered a *de novo* trimeric ACE2 (T-ACE2) protein scaffold that binds the trimeric spike  
25 protein with extremely high affinity ( $K_D < 1$  pM), while retaining ACE2 native sequence. T-  
26 ACE2 potently inhibits all tested pseudotyped viruses including SARS-CoV-2, SARS-CoV,  
27 eight naturally occurring SARS-CoV-2 mutants, two SARSr-CoVs as well as authentic SARS-  
28 CoV-2. The cryo-EM structure reveals that T-ACE2 can induce the transit of spike protein to  
29 “three-up” RBD conformation upon binding. T-ACE2 thus represents a promising class of  
30 broadly neutralizing proteins against SARS-CoVs and mutants.

31 Coronavirus disease 2019 (COVID-19) caused by SARS-CoV-2 has resulted in a severe global  
32 pandemic. Following SARS-CoV, SARS-CoV-2 is yet another emergent beta-coronavirus  
33 threatening human health <sup>1</sup>. SARS-CoV-2 and SARS-CoV (SARS-CoVs) are very similar by  
34 sharing 79.5% sequence identity <sup>1</sup>, similar spike protein structures <sup>2-4</sup> and same cell surface  
35 receptor angiotensin converting enzyme II (ACE2) <sup>1,5</sup>. However, seventeen years after the severe  
36 acute respiratory syndrome (SARS) pandemic, no targeted vaccines or therapeutics have been  
37 approved for SARS, some of which might have held promise for treating COVID-19. Many  
38 neutralizing antibodies against SARS-CoV-2 are currently being urgently developed <sup>6-10</sup>, and  
39 some of these might become available later this year or next year. However, RNA viruses are  
40 known to have higher mutation rates <sup>11,12</sup>. Many SARS-CoV-2 mutations have already been  
41 identified such as D614G <sup>13-16</sup>. This means that resultant mutation strains could make current  
42 SARS-CoV-2 neutralizing antibodies ineffective in the future. The appearance of COVID-19  
43 after SARS indicates the likely emergence of other coronavirus pandemics in the future. Thus,  
44 therapeutics broadly effective against SARS-CoV-2 and mutants, even other SARS-CoV-2-  
45 related coronaviruses, are highly desirable. Both SARS-CoV-2 and SARS-CoV bind ACE2 for  
46 cell entry, suggesting that SARS-CoV-2 mutants and future related coronaviruses are also likely  
47 to bind ACE2. Therefore, proteins engineered based on wild-type ACE2 could serve as the most  
48 broadly neutralizing proteins against these viruses and will be least likely to face mutational  
49 escape.

50 The biological function of ACE2 further supports using ACE2 decoy proteins to treat  
51 patients infected with SARS-CoVs. Coronavirus infection, or even spike protein binding, can  
52 cause shedding of ACE2 from cell surface resulting in a decreased level of ACE2 expression and  
53 accumulation of plasma angiotensin II <sup>17-19</sup>. This phenomenon is closely related to acute lung  
54 injury <sup>17,20-22</sup>. Replenishing soluble ACE2 could alleviate acute respiratory distress syndrome  
55 (ARDS) <sup>17,21-23</sup>. In fact, it has been shown that recombinant soluble ACE2 could inhibit infection  
56 from SARS-CoVs in cell assays and organoids <sup>24-26</sup>. One clinical trial (NCT04335136) was also  
57 registered to use recombinant ACE2 to treat COVID-19. However, recombinant soluble ACE2  
58 inhibits viral infection at relatively high concentrations <sup>24,26-28</sup>, therefore, it may not be an optimal  
59 inhibitor. Engineered ACE2 bearing multiple mutations and ACE2-Ig have better spike protein  
60 binding affinities and better virus inhibition activities <sup>25,27-29</sup>. Since spike proteins of SARS-CoVs  
61 function as trimers <sup>2-4</sup>, we reasoned that an engineered trimeric ACE2 protein could potentially

62 bind up to three receptor binding domains (RBD) on the spike protein, which would dramatically  
63 increase binding affinity through avidity and thus potentially inhibit SARS-CoVs (fig. S1).

64 To develop such trimeric ACE2 proteins, we chose a C-terminal domain of T4 fibrin  
65 (foldon)<sup>30,31</sup>, or a three helix bundle (3HB)<sup>32,33</sup>, as trimerization motifs since these have been  
66 successfully demonstrated to form stable protein trimers<sup>3,30,31</sup>. We then looked at the reported  
67 SARS-CoVs spike protein structures to determine the most appropriate linker between  
68 trimerization motifs and ACE2<sup>3,34-38</sup>. It has been found that SARS-CoV spike protein mostly  
69 adopts one- or two-up RBD conformations and can engage one or two ACE2 monomers<sup>34,35</sup>. On  
70 the other hand, a very small population of SARS-CoV spike protein can have three-up RBD  
71 conformation to bind three ACE2 monomers. SARS-CoV-2 structures mostly have closed  
72 conformation or one RBD in the up position<sup>3,36,37</sup>. From these structural analyses, we estimated  
73 that distances between RBDs on the same spike protein could range from 60 Å to 100 Å when  
74 they are in the up positions. Moreover, structures from SARS-CoV viral particle revealed there  
75 are about 100 spike protein trimers displayed on the 100 nm diameter viral particle surface  
76 giving interspike protein distance around 200 Å<sup>4,39,40</sup>. To retain the possibility for intraspikes or  
77 interspike avidity, we chose a flexible (GGGS)<sub>5</sub> linker, or a more rigid (EAAAK)<sub>5</sub> linker, to  
78 construct trimeric ACE2<sup>41</sup>. We used wild-type ACE2 peptidase domain (1-615) to construct all  
79 trimeric ACE2 decoy proteins. Linkers were inserted after ACE2, followed by the trimerization  
80 motifs. We therefore constructed four trimeric ACE2 proteins: ACE2-flexible-3HB, ACE2-rigid-  
81 3HB, ACE2-flexible-foldon and ACE2-rigid-foldon. In addition, we constructed two trimeric  
82 ACE2 proteins with a short linker GGGS (ACE2-short-3HB, ACE2-short-foldon) and a  
83 monomeric ACE2 as control proteins (fig. S2).

84

## 85 **Results**

86 We first used ELISA assay to determine binding affinities between ACE2 proteins and the  
87 prefusion stabilized trimeric SARS-CoV-2 spike protein ectodomain (S-ECD) (**Fig. 1**)<sup>3</sup>. ACE2  
88 monomer binds S-ECD with IC<sub>50</sub> of 27 nM. For trimeric ACE2 proteins, we saw significant  
89 binding affinity enhancement. We found that the rigid linker constructs had the highest binding  
90 affinities, including ACE2-rigid-3HB and ACE2-rigid-foldon, which both bound S-ECD with  
91 IC<sub>50</sub> of 30 pM. Trimeric ACE2 proteins with short linkers had lower binding affinities (fig. S3).

92 We further analyzed ACE2 proteins binding using biolayer interferometry (ForteBio Octet  
93 RED96) (**Fig. 1**). S-ECD was biotinylated with NHS-PEG8-Biotin and was loaded on  
94 streptavidin coated sensors at about 25% saturation to avoid artificial intermolecular avidity,  
95 followed by titration of engineered ACE2 decoy proteins as analytes.  $K_D$  for ACE2 monomer/S-  
96 ECD was 25 nM, agreeing very well with previously published results<sup>3</sup>. For trimeric ACE2  
97 proteins, we again observed dramatically increased binding affinities.  $K_D$  for ACE2-flexible-  
98 3HB/S-ECD was 4.4 nM while  $K_D$  for ACE2-flexible-foldon/S-ECD went down to 0.34 nM.  
99 Both ACE2-rigid-3HB and ACE2-rigid-foldon bound S-ECD extremely tight, with  $K_D < 1$  pM.  
100 Further decreasing loading of S-ECD on streptavidin sensors did not affect ACE2 proteins  
101 binding, suggesting intramolecular avidity binding between trimeric ACE2s and S-ECD (fig.  
102 S4). The massive binding affinity enhancement for ACE2-rigid-3HB and ACE2-rigid-foldon  
103 also indicates that spike protein probably has at least two RBDs in the up position upon binding.

104 Next, we assessed the inhibitory activities of these trimeric ACE2 decoy proteins using  
105 SARS-CoV-2 and SARS-CoV pseudotyped viruses in an infection assay of Huh-7 cells (**Fig. 2**).  
106 ACE2 monomer can only inhibit SARS-CoV-2 pseudotyped virus at high concentration with  
107  $IC_{50} > 50$  nM. As expected, trimeric ACE2 with flexible linkers showed much better inhibitory  
108 activities. ACE2-flexible-3HB inhibited SARS-CoV-2 infection with  $IC_{50}$  of 3.46 nM, while  
109 ACE2-flexible-foldon had better inhibitory activity with  $IC_{50}$  of 1.58 nM. Rigid-linker trimeric  
110 ACE2 proteins again displayed the highest inhibitory activities. ACE2-rigid-3HB and ACE2-  
111 rigid-foldon showed similar  $IC_{50}$ 's of 0.40 nM and 0.48 nM, respectively. Short-linker trimeric  
112 ACE2 proteins showed no dramatically improved inhibitory activities compared with ACE2  
113 monomer, even though they have higher binding affinities than ACE2 monomer (fig. S5).  
114 Similar results were observed with SARS-CoV pseudotyped virus inhibition. (**Fig. 2**). ACE2  
115 monomer had weak inhibitory activity with  $IC_{50} > 50$  nM, while ACE2-rigid-foldon had the best  
116 inhibitory activity with  $IC_{50}$  of 2.41 nM. Thus, the ACE2-rigid-foldon construct is the most  
117 potent trimeric ACE2, which is designated T-ACE2 hereafter.

118 We then asked whether T-ACE2 could also inhibit SARS-CoV-2 mutants and related  
119 coronaviruses (**Fig. 2**). We tested T-ACE2 inhibitory activities on eight naturally occurring  
120 SARS-CoV-2 mutants, including seven RBD domain mutations<sup>14,16</sup>, D614G mutation<sup>13</sup> and two  
121 SARSr-CoVs (WIV1 and Rs3367). We found that T-ACE2 could potently inhibit all these  
122 viruses at low nM to sub-nM  $IC_{50}$  concentrations (**Fig. 2**). Future identified novel mutations and

123 related coronaviruses are unlikely to escape ACE2. The observed inhibitory activities prompt us  
124 to speculate T-ACE2 will have a high probability to inhibit many of these novel mutants if not  
125 all.

126 We further tested T-ACE2 inhibition of authentic SARS-CoV-2 virus (**Fig. 3**). Vero E6 cells  
127 were infected with authentic SARS-CoV-2, and inhibitory efficacy was then evaluated using  
128 quantitative real-time (qPCR) and confirmed with visualization of virus nucleoprotein (N  
129 protein) through immunofluorescence microscopy. Importantly, we found that T-ACE2 could  
130 also potently inhibit authentic SARS-CoV-2 with IC<sub>50</sub> of 1.88 nM, which agreed well with our  
131 binding affinity and pseudotyped virus inhibition results.

132 We hypothesized that properly designed trimeric ACE2 might engage more than one  
133 RBDs from the trimeric spike protein and thus dramatically increase binding affinity through  
134 avidity effect. To further test this hypothesis, we cleaved off T-ACE2 C-terminal tag using  
135 HRV3C protease, incubated with S-ECD and determined the complex structure using cryo-  
136 electron microscopy (cryo-EM) (fig. S6-S8). For simplicity, we still kept the same name T-  
137 ACE2 for the C-terminal tag cleaved protein.

138 Strikingly, in the complex, the spike protein adopts only one conformation: the “three-up”  
139 RBD conformation. The complex has a nearly perfect three-fold symmetry. Most importantly, all  
140 three RBDs bind to three ACE2s simultaneously. (**Fig. 4**). The binding interactions between  
141 ACE2 and RBD are essentially the same as previous studies, and the three copies from the  
142 complex align quite well (fig. S8-S9)<sup>42,43</sup>. Although we couldn’t observe the linker and the  
143 trimerization motif, we are relatively confident that the three ACE2s binding to the same spike  
144 protein are from the same trimer because of the binding affinity data and virus inhibition data.  
145 This spike protein conformation is very different from the previously reported prefusion  
146 stabilized spike protein structures where only one or no RBD is in the up position. Recent  
147 complex structures between SARS-CoV-2 spike protein and ACE2 monomer from preprints  
148 indicate that monomer ACE2 binding can induce conformational changes of spike protein and  
149 that some spike protein can have two or three RBDs in the up position to bind up to three ACE2s  
150<sup>44,45</sup>. In our structure, the unique “three-up” RBD conformation in all the spike proteins should,  
151 indeed, be induced by our trimeric ACE2.

152 The distance between the C-terminal end of the three ACE2s is around 110 Å (**Fig. 4**). If the  
153 trimerization motif sits right in the center, then the ideal linker length between trimerization

154 motif and ACE2 would be around 60 Å, which corresponds to the length of the (GGGGS)<sub>3</sub>  
155 linker. Thus, the (GGGGS)<sub>5</sub> flexible linker in some of our designed proteins is long enough for  
156 three ACE2s to bind, but is not optimal. The more rigid (EAAAK)<sub>5</sub> linker is shorter than  
157 (GGGGS)<sub>5</sub> and can effectively separate different functional domains of fusion proteins<sup>46</sup>. We  
158 think the effective length of the (EAAAK)<sub>5</sub> linker is probably around 60 Å, making it an optimal  
159 linker for T-ACE2. The rigid nature of this (EAAAK)<sub>5</sub> linker probably helps to orient ACE2  
160 right around RBD for immediate rebinding even if one ACE2 monomer from T-ACE2  
161 dissociates from the spike protein.

162

## 163 **Discussion**

164 Since the beginning of COVID-19 pandemic, tremendous efforts have been made to  
165 develop therapeutics, especially those that utilize neutralizing antibodies. However, the  
166 widespread and ongoing crisis of COVID-19 indicates that SARS-CoV-2 will not soon be  
167 eliminated, making it prudent to anticipate future mutations notably obviating any current  
168 neutralizing antibodies. Moreover, the emergence of COVID-19 after SARS suggests that related  
169 coronavirus pandemics might happen in the future. Such events call for therapeutic approaches  
170 widely useful for current and future related coronaviruses and mutants.

171 Several engineered ACE2 proteins bearing different number of mutations and their Ig fusion  
172 proteins have been shown to increase spike protein binding affinities and virus inhibitory  
173 activities, albeit with reduced or loss of catalytic activities<sup>28,47</sup>. ACE2-Ig fusion proteins and  
174 neutralizing antibodies potentially could have antibody-dependent enhancement (ADE) effect to  
175 facilitate virus infection, although such phenomenon still needs further clinical studies<sup>48,49</sup>. Here,  
176 we engineered trimeric ACE2 proteins based on wild-type ACE2 and showed that T-ACE2 could  
177 bind spike protein with extremely high affinity to potently inhibit all tested pseudotyped viruses  
178 including SARS-CoV-2, SARS-CoV, eight naturally occurring SARS-CoV-2 mutants, two  
179 SARSr-CoVs as well as authentic SARS-CoV-2. The rigid linker employed in T-ACE2 was  
180 previously injected into mice and didn't seem to show strong immunogenicity<sup>50</sup>. The 3HB and  
181 foldon trimerization motifs have been observed to cause immunogenicity, but the introduction of  
182 glycans could silence the immunogenicity without disrupting the trimer formation<sup>51</sup>. Carrying  
183 these advancements a few steps beyond, the modular design of T-ACE2 demonstrates that other

184 oligomerization motifs and linkers could be further explored to improve properties of T-ACE2 or  
185 higher oligomeric ACE2s.

186 We demonstrated that T-ACE2 could induce the transit of spike protein to a unique “three-  
187 up” RBD conformation and bind all three RBDs simultaneously. Whether this T-ACE2-induced  
188 spike protein conformation change represents a transition state during virus infection cannot be  
189 definitively answered here. Full-length ACE2 protein functions as a dimer<sup>42</sup>, the two monomers  
190 from this ACE2 dimer are related by two-fold symmetry. They are also situated close in space,  
191 with the distance between D615 being about 53 Å. Thus, the native dimeric ACE2 is unlikely to  
192 engage more than one RBD from the same spike protein without substantial conformational  
193 changes. It is however possible that ACE2 dimers on the cell surface might further cluster to  
194 induce more RBDs to adopt up conformation and help virus to transit from the prefusion state to  
195 the postfusion state.

196 ACE2 plays an important role in negatively regulating the renin-angiotensin-aldosterone  
197 system (RAS) to counterbalance ACE<sup>52</sup>. Downregulation of ACE2 and elevated plasma  
198 angiotensin II level have been observed after SARS-CoV, SARS-CoV-2 or influenza infection,  
199 contributing to hyper-activated RAS cascades and ARDS<sup>18-20,22,52</sup>. Supplementing soluble ACE2  
200 can balance RAS and improve ARDS conditions<sup>17,21-23,52,53</sup>. These factors all seem to support the  
201 beneficial effects of the biological function of ACE2 for treating COVID-19 patients even  
202 though further studies are still needed to confer this advantage. Thus, proteins engineered based  
203 on wild-type ACE2, such as T-ACE2, can potently and broadly inhibit virus infections, they also  
204 have the added benefits of regulating RAS and alleviating ARDS. These potential beneficial  
205 effects distinguish proteins like T-ACE2 from neutralizing antibodies. We believe T-ACE2  
206 represents a promising class of proteins to broadly inhibit SARS-CoVs and to treat viruses  
207 infected patients. Finally, the extremely high binding affinity between T-ACE2 and spike protein  
208 ( $K_D < 1\text{pM}$ ) suggests that T-ACE2 could also be useful for virus detection. The fact that T-ACE2  
209 was engineered based on native ACE2 sequence also makes such detection methods widely  
210 useful for all SARS-CoVs and related viruses.

211

212

213

214

215 **Acknowledgments:** We thank the Cryo-EM facility, Supercomputer Center of Westlake  
216 University for providing cryo-EM and computation support, respectively. We thank members of  
217 the Core Facility of Microbiology and Parasitology (SHMC) and the Biosafety Level 3  
218 Laboratory at Shanghai Medical College of Fudan University, especially Qian Wang, Zhiping  
219 Sun, Chengjian Gu, for continuous support. We thank Tian Li for helping protein expression  
220 and purifications, we thank Mohamad Sawan, Dan Ma and Huaizong Shen for sharing protein  
221 expression, purification and cell culture facilities.

222  
223 **Funding:** This work was supported by Westlake Education Foundation and Tencent Foundation,  
224 the National Megaprojects of China for Major Infectious Diseases (2018ZX10301403 to L.L.),  
225 The Natural Science Foundation of China (projects 31971123, 81920108015, and 31930059), the  
226 Key R&D Program of Zhejiang Province (2020C04001), and the SARS-CoV-2 emergency  
227 project of the Science and Technology Department of Zhejiang Province (2020C03129).

228  
229 **Author contributions:** BD conceived the project. LG prepared all the ACE2 proteins and did  
230 binding affinity measurements with help from KZ, MZ and XB. WB and XW did pseudotyped  
231 virus inhibition assays under the supervision of BD, LL, YX, and SJ with help from XC and YL.  
232 WX, XC and YL did authentic virus inhibition assays under the supervision of YX, DQ and LL.  
233 RY, YZ and YL did cryo-EM structure determination under the supervision of QZ. BD, LL, QZ,  
234 YX and SJ interpreted the data, wrote and revised the manuscript.

235  
236 **Competing interests:** BD, LG, WB are the inventors on a provisional patent filing by the  
237 Westlake University. The other authors declare no competing interests.

238  
239 **Data and materials availability:** Atomic coordinates and cryo-EM density maps of the S-ECD  
240 of SARS-CoV-2 in complex with T-ACE2 (PDB: 7CT5; whole map: EMD-30460, local map of  
241 the interface between RBD of SARS-CoV-2 and ACE2: EMD-30461) have been deposited to the  
242 Protein Data Bank (<http://www.rcsb.org>) and the Electron Microscopy Data Bank  
243 (<https://www.ebi.ac.uk/pdbe/emdb/>), respectively.

244  
245  
246  
247



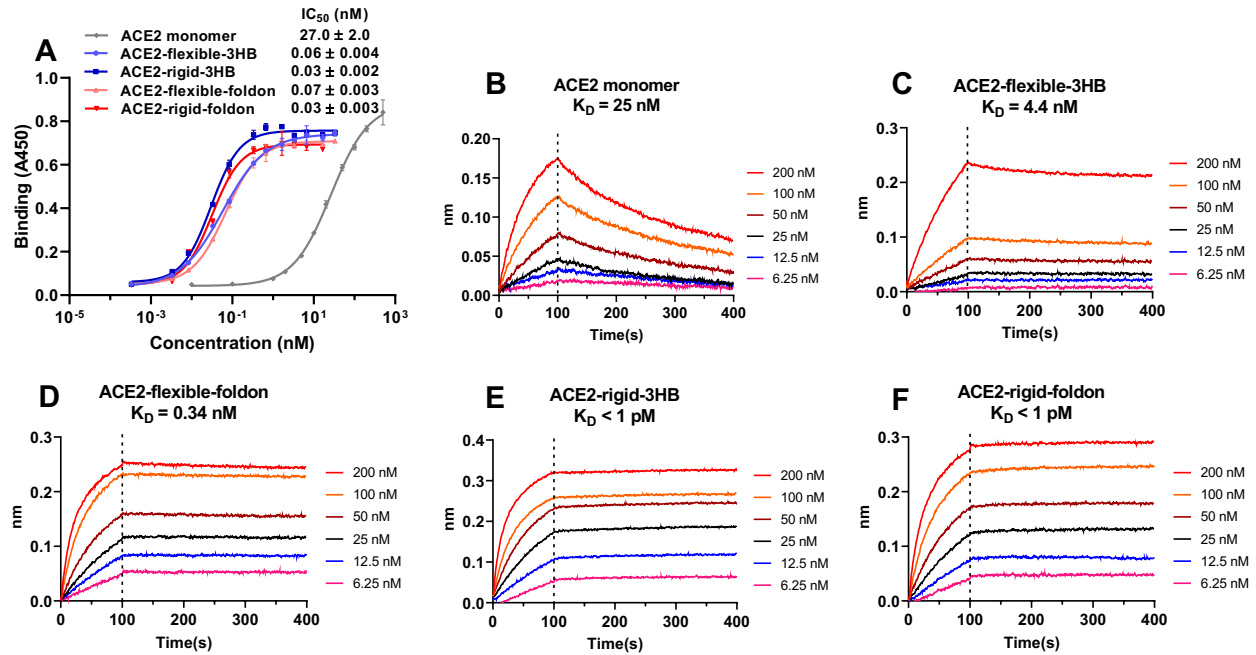

248

249

250

251

252

**Fig. 1. Binding affinities measurements between ACE2 proteins and SARS-CoV-2 spike protein ectodomain (S-ECD). (A) Binding affinities measured using ELISA assay. (B-F) Binding affinities measured using biolayer interferometry.**

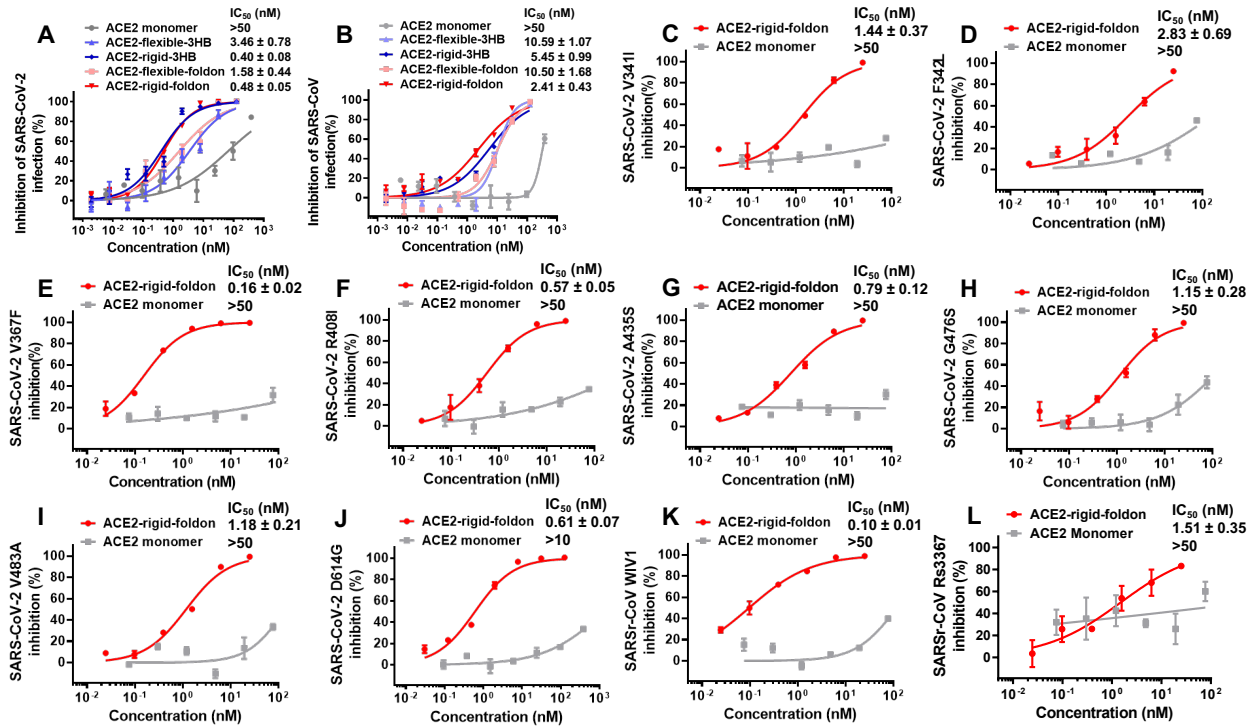

253

254

255

256

257

258

**Fig. 2. ACE2 proteins inhibition of SARS-CoVs pseudotyped viruses (n=3).** (A) ACE2 proteins inhibition of SARS-CoV-2. (B) ACE2 proteins inhibition of SARS-CoV. (C-J) ACE2-rigid-foldon (T-ACE2) inhibition of SARS-CoV-2 mutants. (K-L) ACE2-rigid-foldon (T-ACE2) inhibition of SARSr-CoVs WIV1 and Rs3367.

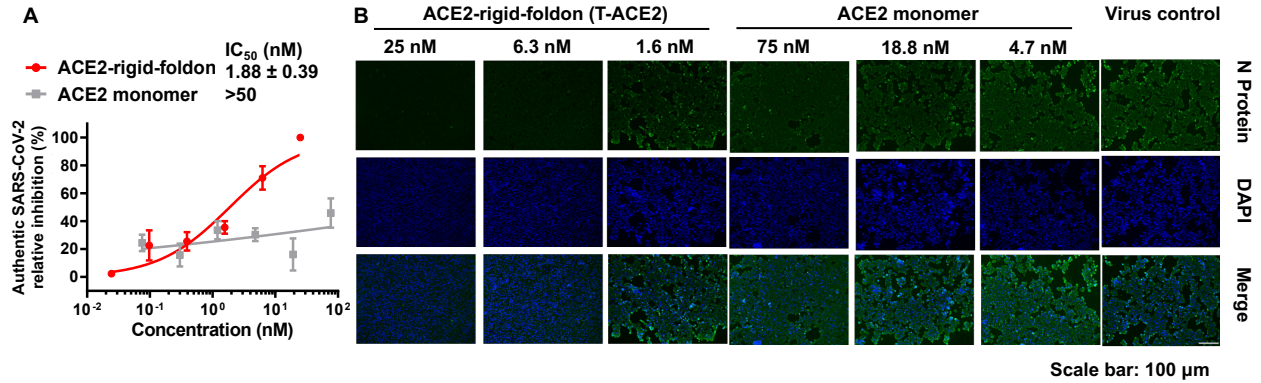

259

260 **Fig. 3. ACE2-rigid-foldon (T-ACE2) inhibition of authentic SARS-CoV-2 virus (n=3).** (A)

261 Vero E6 cells were infected with authentic SARS-CoV-2, and inhibitory effects were evaluated

262 using quantitative real-time (qPCR). (B) Immunofluorescence microscopy of virus infection

263 upon treatment of ACE2-rigid-foldon (T-ACE2) or ACE2 monomer.

264

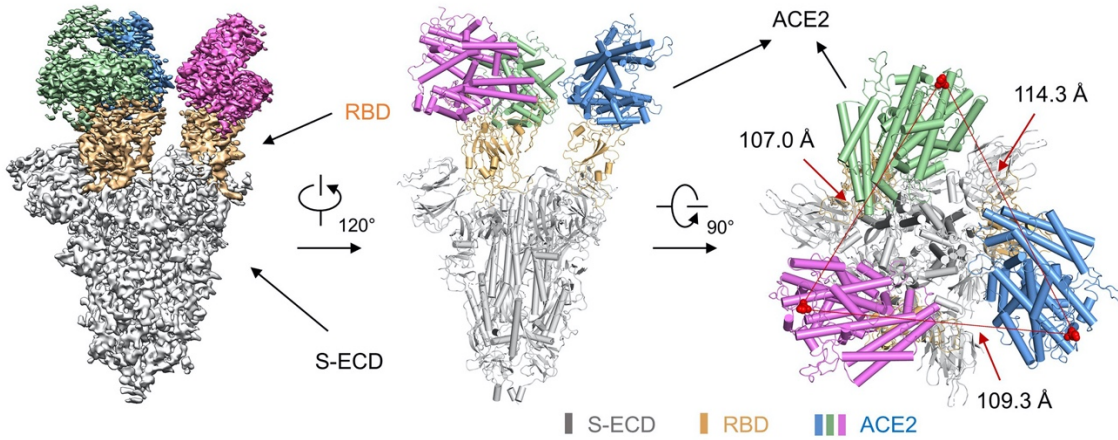

265

266

267

268

269

270

271

272

273

274

275

276

277

278

279

280

281

282

283

284

285

286

287

**Fig. 4. Cryo-EM structure of the T-ACE2/S-ECD complex.** The domain-colored cryo-EM map of the complex is shown on the left. Two perpendicular views of the overall structure are shown on the right. The three ACE2 monomers from T-ACE2 are colored blue, green and violet, respectively. The RBDs of the S-ECD are colored orange.

288 **Methods**

289 **Protein preparations**

290 To construct trimeric ACE2s, we inserted the linker sequences (GGGS)<sub>5</sub>, (EAAAK)<sub>5</sub> or  
291 GGGS after ACE2(1-615), followed by trimerization motifs, an HRV3C cleavage sequence, an  
292 eGFP tag and a His8 tag. Monomeric ACE2 was constructed as ACE2(1-615)-(GGGS)<sub>5</sub>-  
293 HRV3C-eGFP- His8 for direct comparison.

294 The ACE2 (accession number: NM\_001371415) peptidase domain (1-615) was cloned from  
295 the plasmid donated by Peihui Wang's lab. The genes of 3HB and foldon were synthesized by  
296 Genewiz, Suzhou, China. All the gene fragments were assembled by the Gibson assembly kit  
297 (Cat.C112-01, Vazyme). The assembled fragments were subcloned in pEGFP-N1 for expression.  
298 The cloned plasmids were transformed into E.coli DH5α for amplification. Amplified plasmids  
299 were extracted using the GoldHi EndoFree Plasmid Maxi Kit (Cat. CW2104M, CWBio).

300 HEK 293F cells (Invitrogen) were cultured in Freestyle medium (Gibco, Lot.2164683) at  
301 37 °C under 6% CO<sub>2</sub> in a CRYSTAL shaker (140 rpm). The cells were transiently transfected  
302 with ACE2 plasmids and polyethylenimine (PEI) (Polysciences, Cat.24765-1) when the cell  
303 density reached approximately 1.0×10<sup>6</sup>/mL. 1 mg of plasmid was premixed with 2.6 mg PEI in  
304 50 mL of fresh medium for 15 minutes before adding to one liter of cell culture. The transfected  
305 cells were cultured for 96 hours before harvesting.

306 For purification of ACE2 proteins, the cell supernatants were harvested by centrifugation at  
307 1000×g for 5 minutes. Then the supernatants were loaded on Ni-NTA beads (Smart-Lifesciences,  
308 Cat. SA004100) and washed with washing buffer (5 mM imidazole, 1 × PBS). Proteins were  
309 then eluted with elution buffer (50 mM imidazole, 1 × PBS).

310 The eluted proteins were concentrated and subjected to size-exclusion chromatography  
311 (Superose 6 Increase 10/300 GL, GE Healthcare) in the PBS buffer. The peak fractions were  
312 collected and concentrated. The proteins were then analyzed by size exclusion chromatography  
313 (AdvanceBio SEC 300Å) in PBS buffer pH 7.4. The standard proteins were purchased from GE  
314 (fig S2).

315 To remove C-terminal tags of ACE2 proteins, 16 μg HRV3C protease (expressed and  
316 purified in house) was add to 1mg ACE2 protein and incubated at 4 °C overnight, followed by  
317 size-exclusion chromatography (Superose 6 Increase 10/300 GL, GE Healthcare) purification  
318 and analysis.

## 319 **Binding affinity measurement using ELISA assays**

### 320 Determination of optimal S-ECD loading

321 96-well ELISA plates (JET BIOFIL, #FEP-100-096) were coated with 50  $\mu$ L per well of  
322 different S-ECD protein concentrations (fig S3) in coating buffer (NCM Biotech, #E30500)  
323 overnight at 4 °C. Plates were washed with phosphate-buffered saline with 0.1% Tween-20  
324 (PBST) four times and then blocked with 2% bovine serum albumin (BSA, Sigma, #B2064-50G)  
325 in PBST for 2 hours at room temperature. After blocking, the plates were washed with PBST  
326 four times and then incubated with 70  $\mu$ L per well of ACE2 monomer in PBST for 2 hours at  
327 37°C. Plates were washed with PBST four times then incubated with 70  $\mu$ L per well of 1:2,000  
328 dilution of Anti-GFP antibody (Rabbit PAb, Sino Biological, #13105-RP01) for 1 h at 37 °C.  
329 Plates were again washed four times, followed by incubation with 70  $\mu$ L per well of 1:10,000  
330 dilution of HRP-conjugated Goat Anti-Rabbit IgG (Beyotime, #A0208) for 1 hour at 37 °C.  
331 After final washing, 100  $\mu$ L per well of TMB single-component substrate solution were added to  
332 the plates (Solarbio, #PR1200), and the reaction was stopped by the addition of 50  $\mu$ L per well of  
333 1M hydrochloric acid. The absorbance at 450 nm was measured on a Microplate reader (Thermo,  
334 Varioskan LUX). From this experiment, we decided to load 3  $\mu$ g/mL S-ECD for ACE2 protein  
335 binding measurement.

336

### 337 Binding measurements

338 To determine the binding affinities of different ACE2 proteins, 96-well ELISA plates (JET  
339 BIOFIL, #FEP-100-096) were coated with 50  $\mu$ L per well of S-ECD (3  $\mu$ g/mL ) in coating buffer  
340 (NCM Biotech, #E30500) overnight at 4 °C. Plates were washed with phosphate-buffered saline  
341 with 0.1% Tween-20 (PBST) four times and then blocked with 2% bovine serum albumin (BSA,  
342 Sigma, #B2064-50G) in PBST for 2 hours at room temperature. After blocking, the plates were  
343 washed with PBST four times and then incubated with 70  $\mu$ L per well of series diluted ACE2  
344 samples in PBST for 2 hours at 37°C. Plates were washed with PBST four times and then  
345 incubated with 70  $\mu$ L per well of 1:2,000 dilution of Anti-GFP antibody (Rabbit PAb, Sino  
346 Biological, #13105-RP01) for 1 hour at 37 °C. Plates were again washed four times, followed by  
347 incubation with 70  $\mu$ L per well of 1:10,000 dilution of HRP-conjugated Goat Anti-Rabbit IgG  
348 (Beyotime, #A0208) for 1 hour at 37 °C. After final washing, 100  $\mu$ L per well of TMB single-  
349 component substrate solution were added to the plates (Solarbio, #PR1200), and the reaction was

350 stopped by the addition of 50  $\mu$ L per well of 1M hydrochloric acid. The absorbance at 450 nm  
351 was measured on a microplate reader (Thermo, Varioskan LUX).

352

### 353 **Binding affinity determination using bio-layer interferometry (BLI)**

#### 354 Protein biotinylation

355 Purified S-ECD protein was biotinylated at a theoretical 1:3 molar ratio with EZ-Link NHS-  
356 PEG12-Biotin (Thermo Fisher Scientific, CAT#: 21313) according to the manufacturer's  
357 instructions. The unreacted biotin was removed by ultrafiltration with an Amicon column (30  
358 KDa MWCO, Millipore, CAT: UFC5010BK).

359

#### 360 Kinetics analyses

361 For kinetics analyses, S-ECD was captured on streptavidin biosensors. Biotinylated S-ECD  
362 was diluted to 20  $\mu$ g/mL in dilution buffer (PBS with 0.02% Tween 20 and 0.1% BSA). Then  
363 sensor baselines were equilibrated in the dilution buffer for 90 seconds. Next, the S-ECD was  
364 loaded until the thickness signal was 0.6 nm or 0.3 nm (low loading). After loading, the sensors  
365 were washed for 60 seconds in the dilution buffer. The sensors were then immersed into wells  
366 containing ACE2 proteins for 100 seconds (association phase), followed by immersion in  
367 dilution buffers for an additional 300 seconds (dissociation phase). The background signal was  
368 measured using a reference sensor with S-ECD loading but no ACE2 protein binding and was  
369 subtracted from the corresponding ACE2 binding sensor. Curve fitting was performed using a  
370 1:1 binding model and the ForteBio data analysis software. Mean  $k_{on}$ ,  $k_{off}$ ,  $K_D$  values were  
371 determined by averaging all binding curves that matched the theoretical fit with an  $R^2$  value of  
372 0.95.

373

#### 374 **Cell lines, plasmids construction and virus**

375 Human hepatoma Huh-7 cells were purchased from the Cell Bank of the Chinese Academy  
376 of Science (Shanghai, China). Human primary embryonic kidney cells (293T) (CRL-3216<sup>TM</sup>)  
377 and African green monkey kidney Vero-E6 (CRL-1586<sup>TM</sup>) were obtained from the American  
378 Type Culture Collection (ATCC). These cells were cultured with Dulbecco's Modified Eagle's  
379 Medium (DMEM) containing 10% Fetal bovine serum (FBS), 100 mg/mL streptomycin, and 100  
380 U/mL penicillin at 37 °C under 5% CO<sub>2</sub>.

381 The envelope-encoding plasmids of SARS-CoV-2-S, SARS-CoV-S, and SARSr-CoV-S  
382 (Rs3367 and WIV1) and luciferase-expressing vector (pNL4-3.Luc.R-E-) were maintained in  
383 house. The plasmids encoding mutant SARS-CoV-2-S (V341I, F342L, V367F, R408I, A435S,  
384 G476S, V483A and D614G) were constructed using a site mutation kit (Yeasen, China) and  
385 confirmed by sequencing.

386 SARS-CoV-2 (SARS-CoV-2 / SH01 / human / 2020 / CHN, GenBank No. MT121215)  
387 was isolated from a COVID-19 patient in Shanghai, China. The virus was purified and  
388 propagated in Vero-E6 cells, then stocked at -80 °C. Viral titer was measured by the 50% Tissue  
389 culture infective dose (TCID<sub>50</sub>) method. All experiments involving live SARS-CoV-2 virus  
390 were performed in Biosafety Level 3 Laboratory (BSL-3), Fudan University.

### 391 **Pseudotyped virus inhibition**

392 Packaging pseudotyped SARS-CoV-2, mutant SARS-CoV-2, SARS-CoV, and SARSr-CoVs

393 These pseudoviruses were generated according to previous studies<sup>54,55</sup>. Briefly, the  
394 envelope-encoding plasmid (20 µg) and pNL4-3.Luc.R-E- (10 µg) were cotransfected into 293T  
395 cells cultured in a 10 cm cell culture dish using Vigofect transfection reagent (Vigorous  
396 Biotechnology, China). After 10 hours, the cell culture medium was changed with fresh DMEM  
397 containing 10% FBS. Supernatants containing pseudovirus were harvested 48 hours later, filtered  
398 with a 0.45 µm filter (Millipore), and used for single-cycle infection.

399

400 Inhibition of Pseudotyped SARS-CoV-2, SARS-CoV-2 mutants, SARS-CoV, and SARSr-CoVs  
401 infections

402 The pseudotyped viruses inhibition assays were conducted as previously described<sup>54,55</sup>.  
403 Briefly, Huh-7 cells were seeded into the 96-well cell culture plate at  $1 \times 10^4$  per well and cultured  
404 for 12 hours. The recombinant proteins were diluted with FBS-free DMEM and mixed with  
405 pseudotyped viruses, incubated at 37 °C for 30 minutes, and added to Huh-7 cells. After 12 hours  
406 of infection, the culture medium was replaced with fresh DMEM containing 10% FBS, and cells  
407 were cultured for an additional 48 hours. Then cells were lysed with Cell Lysis Buffer (Promega,  
408 Madison, WI, USA), and the luciferase activity was detected using the Luciferase Assay System  
409 (Promega, Madison, WI, USA), all data were analyzed using Prism Graphpad.

410

411 **Authentic SARS-CoV-2 virus inhibition or authentic SARS-CoV-2 neutralization**



412 The live SARS-CoV-2 inhibition assay was performed as previously described<sup>56</sup>. Briefly,  
413 Vero-E6 cells were seeded into the 96-well cell culture plate at  $3 \times 10^4$  per well and cultured for  
414 12 hours. Recombinant proteins were diluted with FBS-free DMEM, mixed with 100 TCID<sub>50</sub> of  
415 SARS-CoV-2, and incubated at 37 °C for 1 hour. Then, the protein-virus mixtures were added to  
416 Vero-E6 cells and incubated at 37 °C for 1 hour. After removing the mixtures, cells were  
417 cultured with fresh DMEM containing 2% FBS for another 48 hours. Then, the supernatants  
418 were collected to detect viral RNA titer. The cells were fixed to perform immunofluorescence  
419 analysis. After fixing with 4% paraformaldehyde, the cells were permeabilized by 0.2% Triton  
420 X-100 and blocked with 3% BSA for 1 hour. Then the SARS-CoV-2 Nucleocapsid Antibody  
421 (1:500) (Sino Biological) was added to cells and reacted at 4°C overnight. Finally, the cells were  
422 incubated with Alexa Fluor 488 Goat anti-Rabbit IgG (1:500) (Invitrogen, USA) at 37°C for 1  
423 hour. The nuclei were stained with NucBlue™ Live ReadyProbes™ Reagent (Thermo Fisher  
424 Scientific, USA) and imaged with fluorescence microscopy.

425  
426 RNA extraction and Quantitative Real-time PCR (qPCR) assay

427 Total viral RNA in supernatants were extracted using Trizol LS reagent (Invitrogen, USA),  
428 according to the manufacturer's manual. Then qPCR was conducted with a One-Step PrimeScrip  
429 RT-PCR Kit (Takara, Japan), following the manufacturer's instructions. qPCR reaction was  
430 performed with the program of 95 °C for 10 seconds, 42 °C for 5 minutes; 40 cycles of 95 °C for  
431 5 seconds, 50 °C for 30 seconds, 72 °C for 30 seconds on Bio-Rad CFX96. Viral loads were  
432 determined by a standard curve prepared with a plasmid containing SARS-CoV-2 nucleocapsid  
433 protein (N) gene (purchased from BGI, China). Primers and probe targeting SARS-CoV-2 N  
434 gene were ordered from Genewiz (Suzhou, China), and the sequences were as follows:

435 SARS-CoV-2-N-F: GGGGAACTTCTCCTGCTAGAAT,  
436 SARS-CoV-2-N-R: CAGACATTTTGCTCTCAAGCTG,  
437 SARS-CoV-2-N-probe: 5'-FAM- TTGCTGCTGCTTGACAGATT-TAMRA-3'.

438  
439 **Cryo-EM sample preparation**

440 Purification of the extracellular domain (ECD) (Genebank ID: QHD43416.1) (1-1208 a.a)  
441 of S protein was as previously reported<sup>57</sup>. For structure determination, we cleaved the C-  
442 terminal tag of T-ACE2 using HRV3C protease. Purified S-ECD was mixed with the T-ACE2 at

443 a molar ratio of about 1:2 for one hour at 4 °C. The mixture was subjected to size-exclusion  
444 chromatography (Superose 6 Increase 10/300 GL, GE Healthcare) in buffer containing 25 mM  
445 Tris (pH 8.0), 150 mM NaCl. Peak fractions of S-ECD in complex with T-ACE2 were collected  
446 for EM analysis.

447 The peak fractions of the complex were concentrated to about 1.5 mg/mL and mixed with  
448 0.05% Octyl Maltoside, Fluorinated (Anatrace) before application to the grids. Aliquots (3.3  $\mu$ L)  
449 of the protein complex were placed on glow-discharged holey carbon grids (Quantifoil Au  
450 R1.2/1.3). The grids were blotted for 2.5 s or 3.0 s and flash-frozen in liquid ethane cooled by  
451 liquid nitrogen with Vitrobot (Mark IV, Thermo Scientific). The cryo-EM samples were  
452 transferred to a Titan Krios operating at 300 kV equipped with Cs corrector, Gatan K3 Summit  
453 detector and GIF Quantum energy filter. Movie stacks were automatically collected using  
454 AutoEMation<sup>58</sup> with a slit width of 20 eV on the energy filter and a defocus range from -1.2  $\mu$ m  
455 to -2.2  $\mu$ m in super-resolution mode at a nominal magnification of 81,000 $\times$ . Each stack was  
456 exposed for 2.56 s with an exposure time of 0.08 s per frame, resulting in a total of 32 frames per  
457 stack. The total dose rate was approximately 50 e<sup>-</sup>/Å<sup>2</sup> for each stack. The stacks were motion  
458 corrected with MotionCor2<sup>59</sup> and binned 2-fold, resulting in a pixel size of 1.087 Å/pixel.  
459 Meanwhile, dose weighting was performed<sup>60</sup>. The defocus values were estimated with Gctf<sup>61</sup>.

460

## 461 **Data processing**

462 Particles were automatically picked using Relion 3.0.6<sup>62-65</sup> from manually selected  
463 micrographs. After 2D classification with Relion, good particles were selected and subjected to  
464 two cycles of heterogeneous refinement without symmetry using cryoSPARC<sup>66</sup>. The good  
465 particles were selected and subjected to Non-uniform Refinement (beta) with C1 symmetry,  
466 resulting in the 3D reconstruction for the whole structures that were further subjected to 3D  
467 classification, 3D auto-refinement and post-processing with Relion. For interface between RBD  
468 and ACE2, the datasets were subjected to focused refinement with adapted mask on each RBD  
469 and ACE2 subcomplex to improve the map quality. Then the dataset of three RBD and ACE2  
470 sub-complexes were combined and subjected to focused refinement with Relion, resulting in the  
471 3D reconstruction of better quality on the interface between S-ECD and ACE2.

472 The resolution was estimated with the gold-standard Fourier shell correlation 0.143 criterion  
473 <sup>67</sup> with high-resolution noise substitution <sup>68</sup>. Refer to (fig S6-8) and Supplemental Table S1 for  
474 details of data collection and processing.

475

### 476 **Model building and structure refinement**

477 For model building of the complex of S-ECD with ACE2, the atomic model of the published  
478 structure S-ECD (PDB ID: 7C2L) and ACE2 molecular (PDB ID: 6M18) were used as  
479 templates, which were molecular dynamics flexible fitted (MDFF) <sup>69</sup> into the whole cryo-EM  
480 map of the complex and the focused-refined cryo-EM map of the RBD-ACE2 subcomplex,  
481 respectively. The fitted atomic models were further manually adjusted with Coot <sup>70</sup>. Each residue  
482 was manually checked with the chemical properties taken into consideration during model  
483 building. Several segments, the corresponding densities of which were invisible, were not  
484 modeled. Structural refinement was performed in Phenix <sup>71</sup> with secondary structure and  
485 geometry restraints to prevent overfitting. To monitor the potential overfitting, the model was  
486 refined against one of the two independent half maps from the gold-standard 3D refinement  
487 approach. Then, the refined model was tested against the other map. Statistics associated with  
488 data collection, 3D reconstruction and model building were summarized in Table S1.

489

490

491

492

493

494

495

496

497

498

499

500

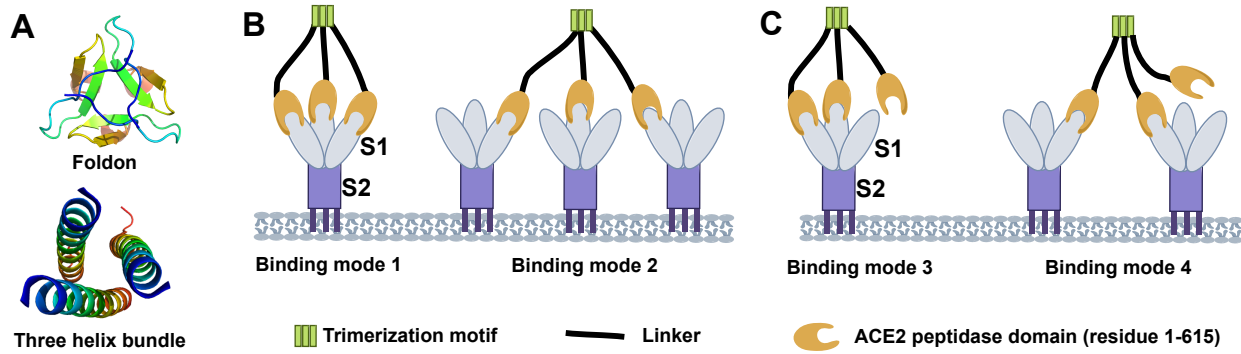

501

502

503

504

505

506

507

**Fig. S1.** ACE2 trimerization strategy and potential interactions between trimeric ACE2 and spike protein trimer. **(A)** Structures of the two ACE2 trimerization motifs. **(B)** Each ACE2 trimer can engage three RBDs either from the same spike protein (mode 1) or different spike proteins (mode 2). **(C)** Only two ACE2s from the trimer can engage two RBDs either from the same spike protein (mode 3) or different spike proteins (mode 4).

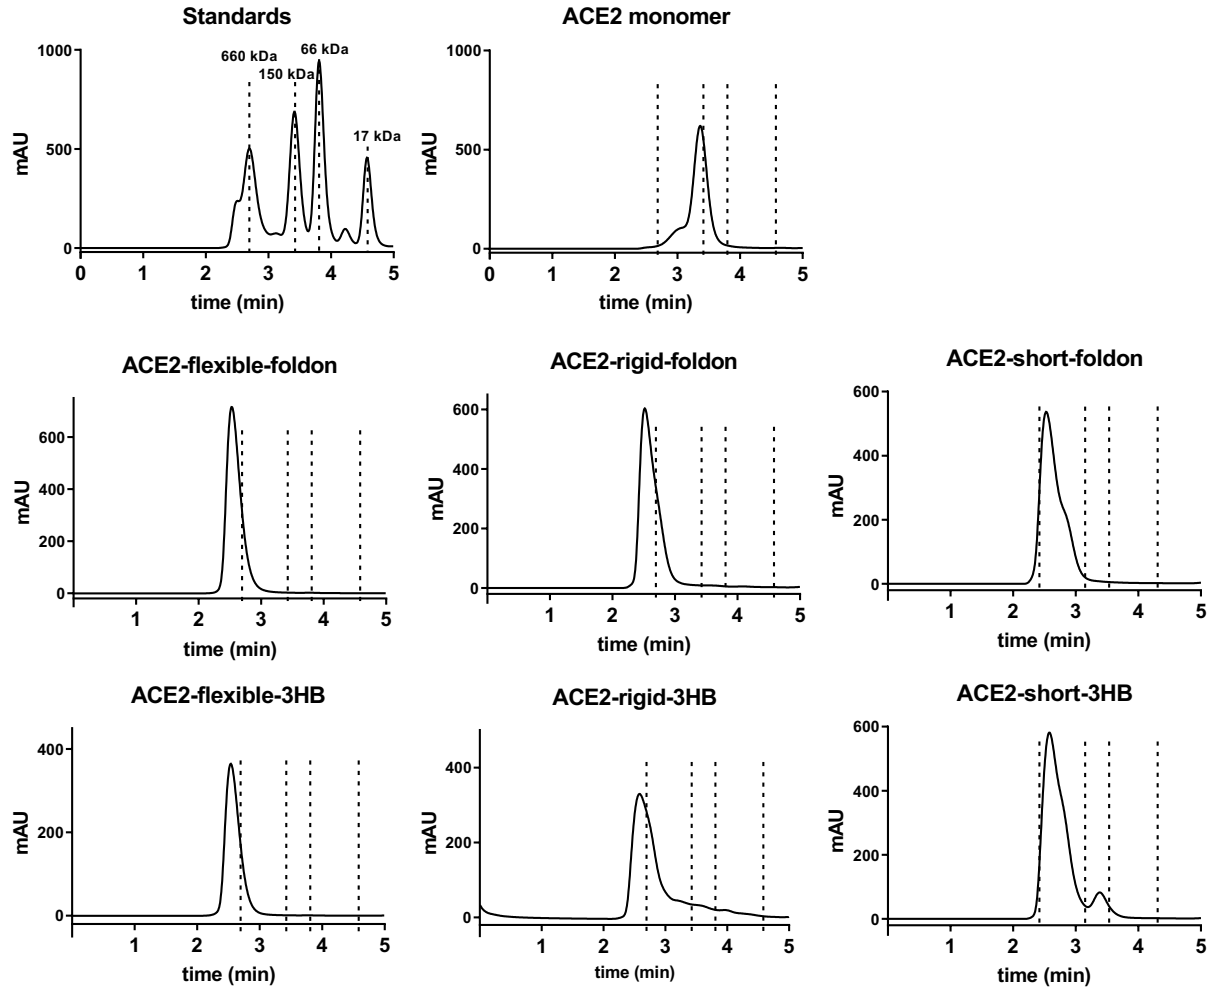

508  
509 **Fig. S2.** Size-exclusion chromatography analyses of ACE2 proteins.  
510

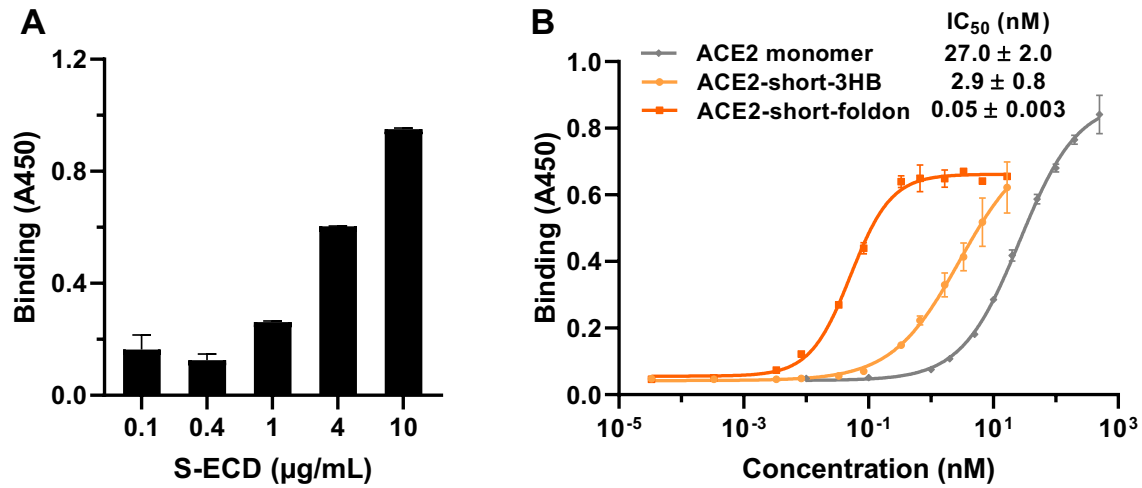

511

512

513

514

**Fig. S3.** ELISA binding measurements. **(A)** S-ECD loading amount optimization. **(B)** Short linker ACE2 proteins binding affinities to S-ECD determined in ELISA assay.

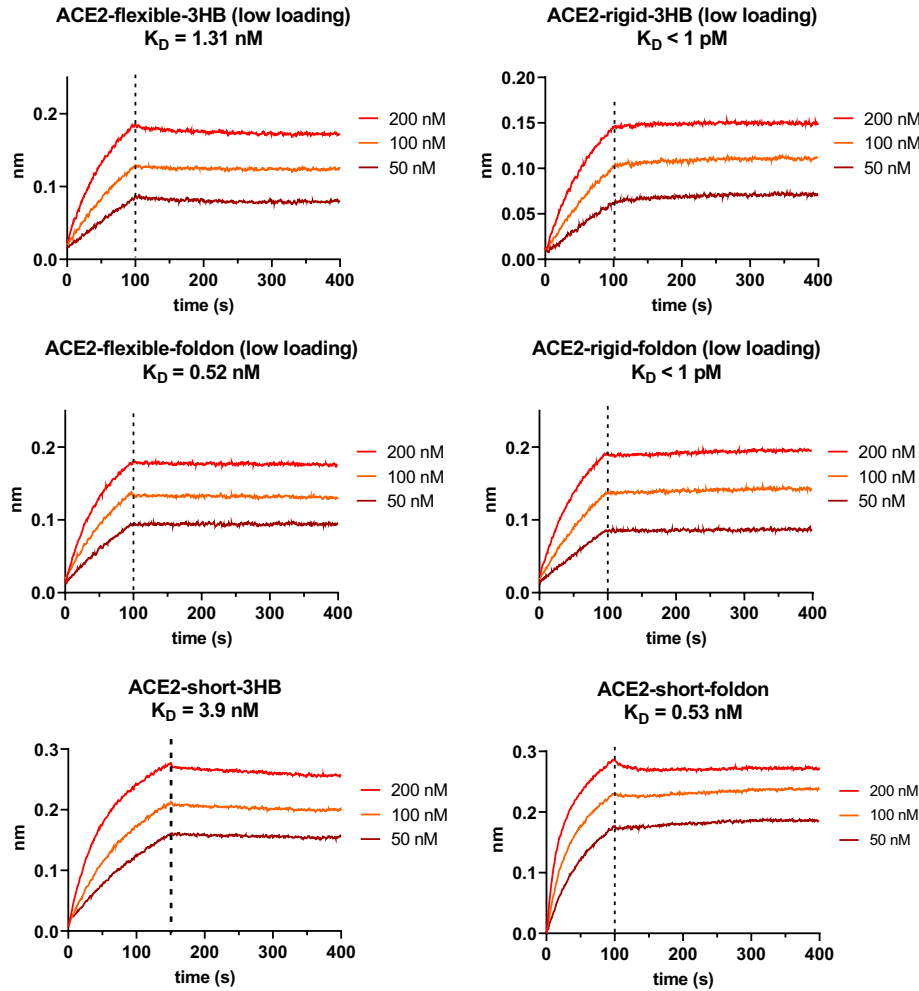

515

516

517

518

519

**Fig. S4.** Binding affinities measurement between ACE2 proteins and SARS-CoV-2 spike protein ectodomain (S-ECD). Low loading means S-ECD was loaded at thickness signal of 0.3 nm, whereas normal loading is thickness signal of 0.6 nm.

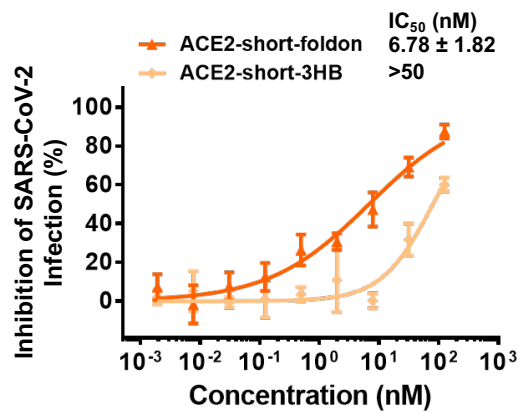

520

521

**Fig. S5.** Short-linker ACE2 proteins inhibition of SARS-CoV-2 pseudotyped virus.

522



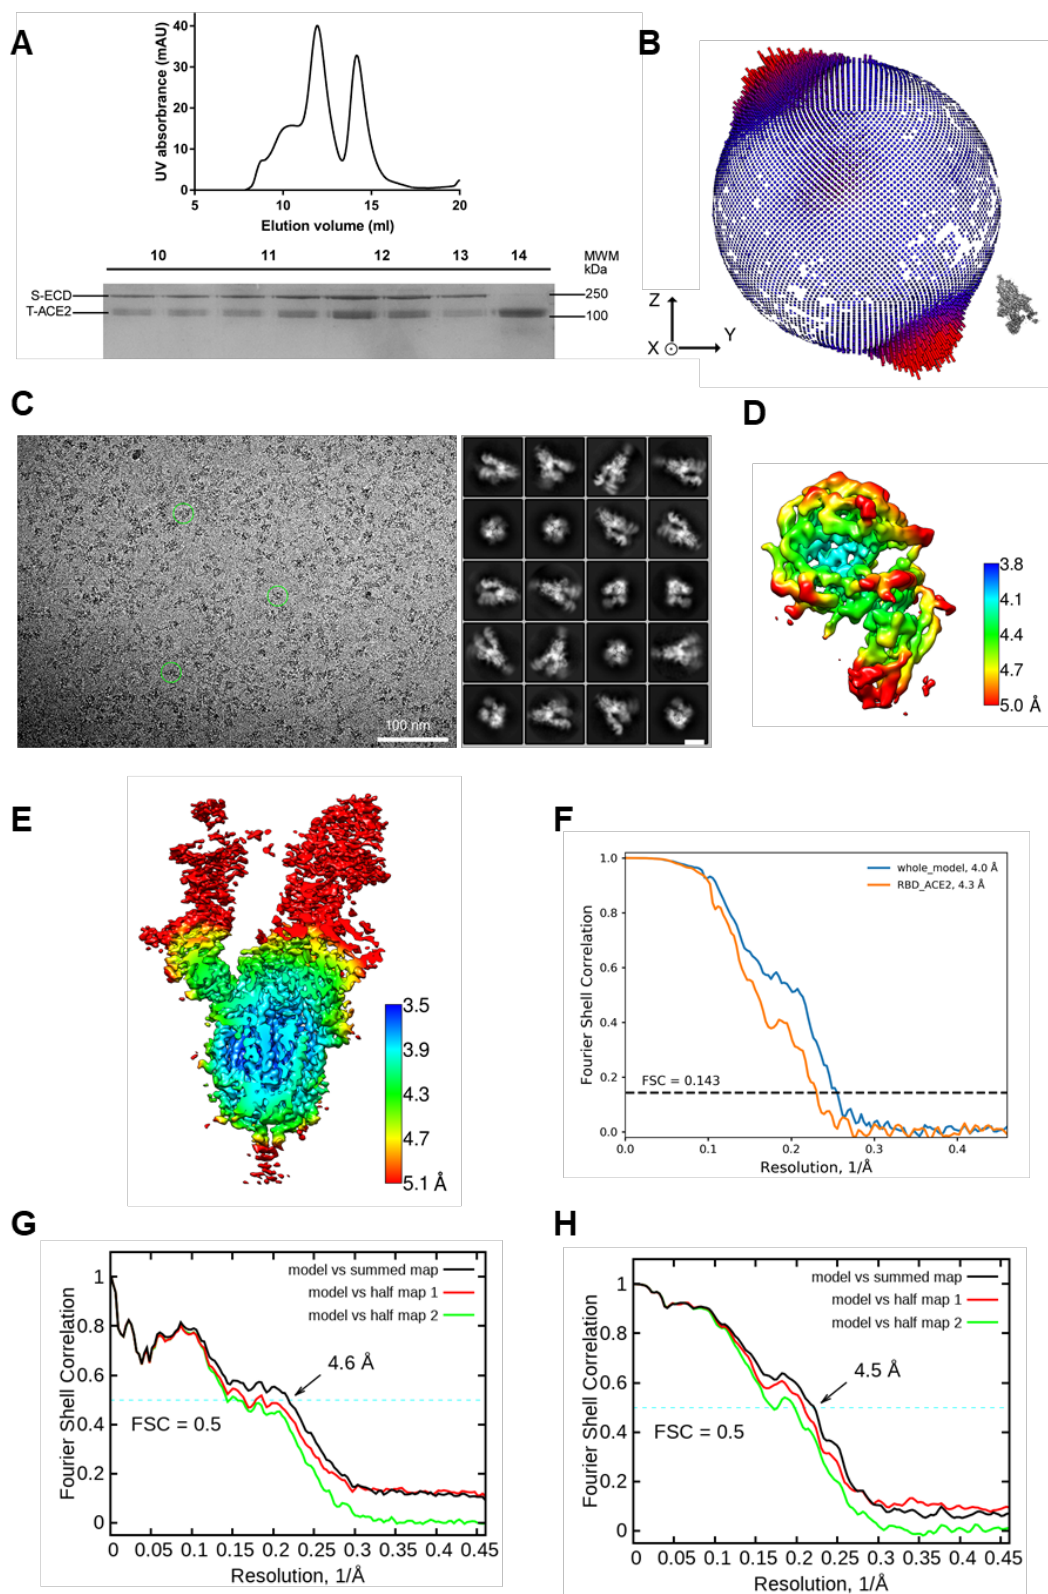

523

524

525

**Fig. S6.** Cryo-EM analysis of S-ECD in complex with ACE2. **(A)** Representative SEC purification profile of the S-ECD in complex with T-ACE2. **(B)** Euler angle distribution in the

526 final 3D reconstruction of S-ECD in the SARS-CoV-2/T-ACE2 complex. **(C)** Representative  
527 cryo-EM micrograph and 2D class averages of cryo-EM particle images. The scale bar in 2D  
528 class averages is 10 nm. **(D)** and **(E)** Local resolution maps for the 3D reconstruction of the  
529 RBD-ACE2 subcomplex and overall structure, respectively. **(F)** FSC curve of the overall  
530 structure (blue) and RBD-ACE2 subcomplex (orange). **(G)** FSC curve of the refined model of S-  
531 ECD of SARS-CoV-2 bound with ACE2 complex versus the overall structure against which it is  
532 refined (black), the refined model against the first half of the map versus the same map (red); and  
533 the refined model against the first half of the map versus the second half map (green). The small  
534 difference between the red and green curves indicates that the refinement of the atomic  
535 coordinates did not allow enough for overfitting. **(H)** FSC curve of the refined model of RBD-  
536 ACE2 subcomplex is the same as **(G)**.  
537

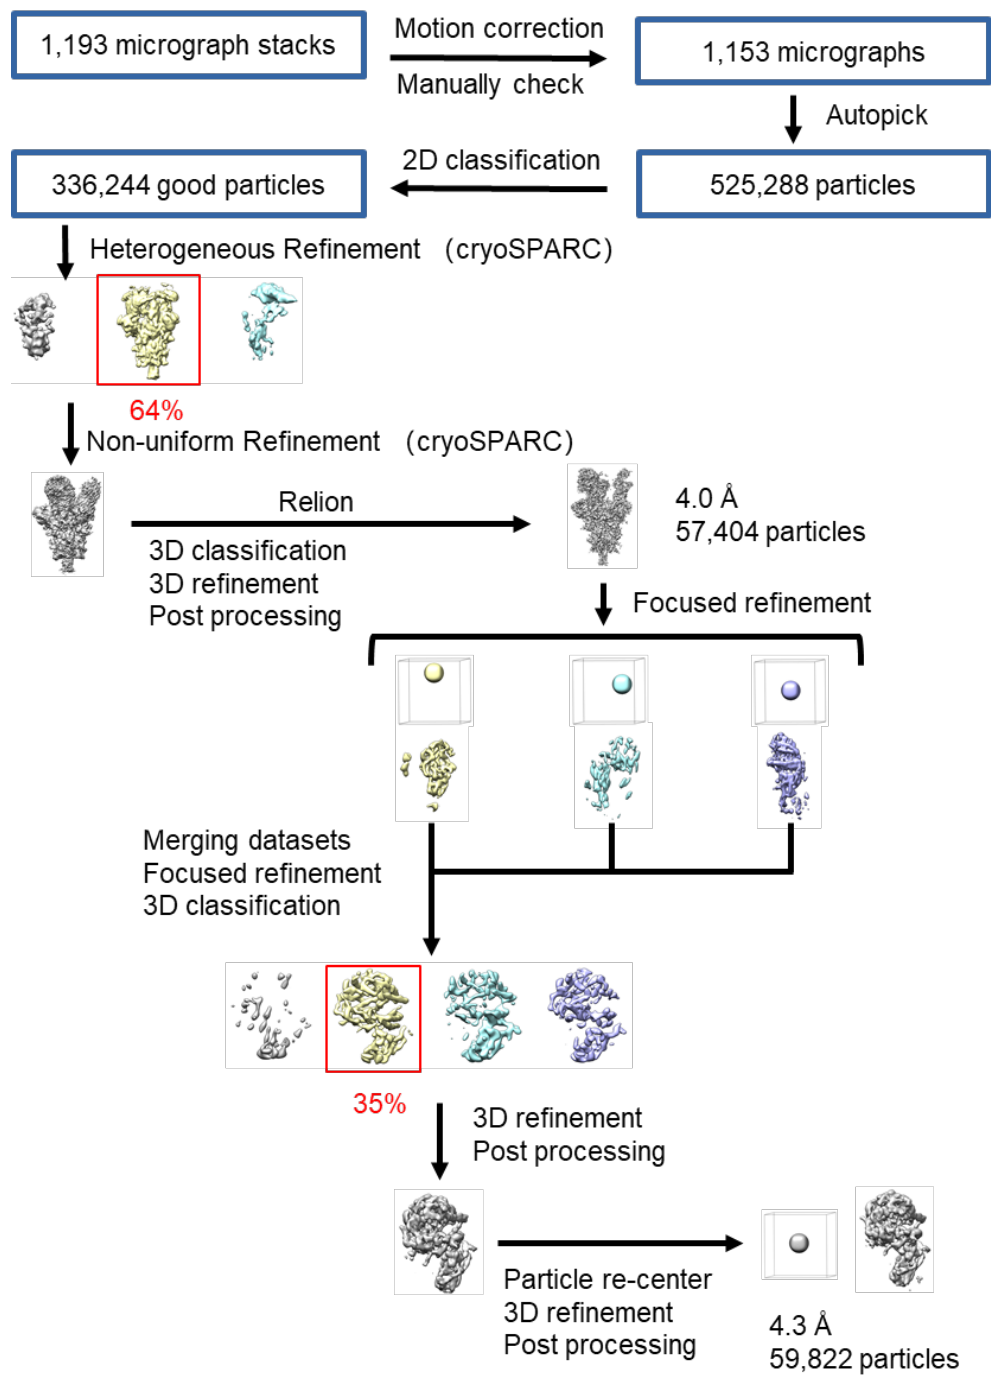

538

539

**Fig. S7.** Flowchart for cryo-EM data processing.

540

Please refer to the 'Data Processing' section in Methods for details.

541

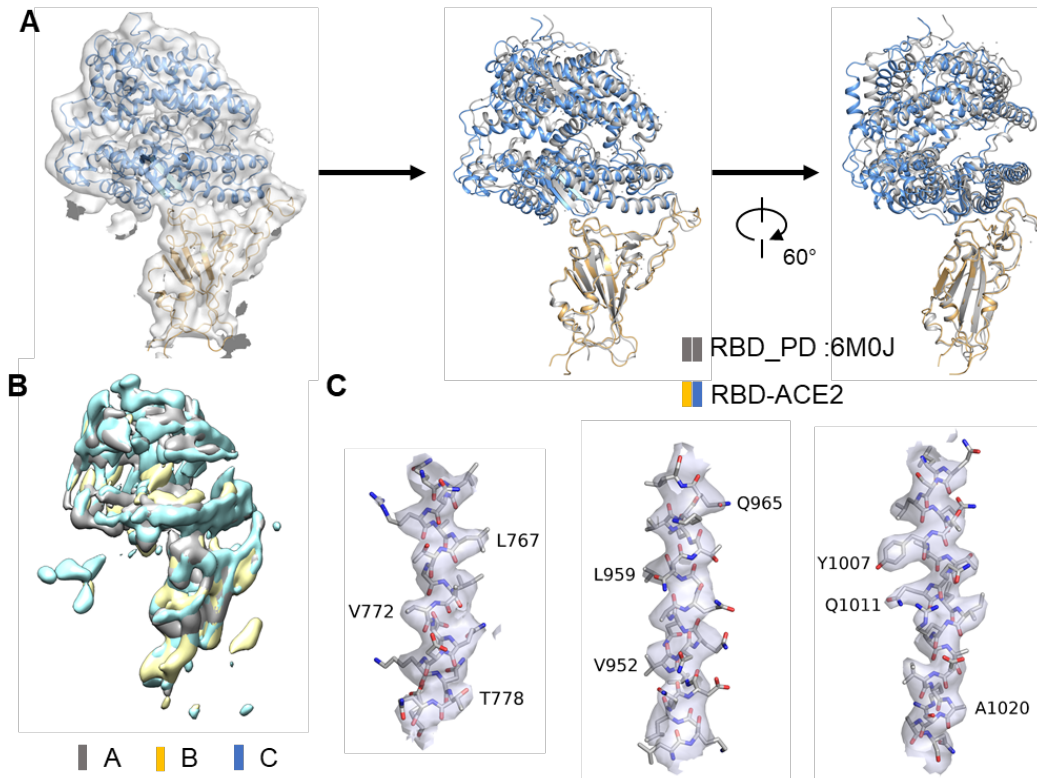

542

543

544

545

546

547

548

549

**Fig. S8.** Structural analysis and representative cryo-EM map densities of S-ECD in complex T-ACE2. **(A)** Structural alignment in the interface of RBD and ACE2 with the RBD-PD complex previously reported (PDB ID: 6M0J) with a root mean squared deviation of 0.776 Å over 178 pairs of  $C\alpha$  atoms. **(B)** Superposition in local map of RBD-ACE2 subcomplex for three protomers, indicating no difference among three maps. **(C)** Representative cryo-EM map densities of S-ECD in complex T-ACE2. All densities are shown at the threshold of  $5\sigma$ .

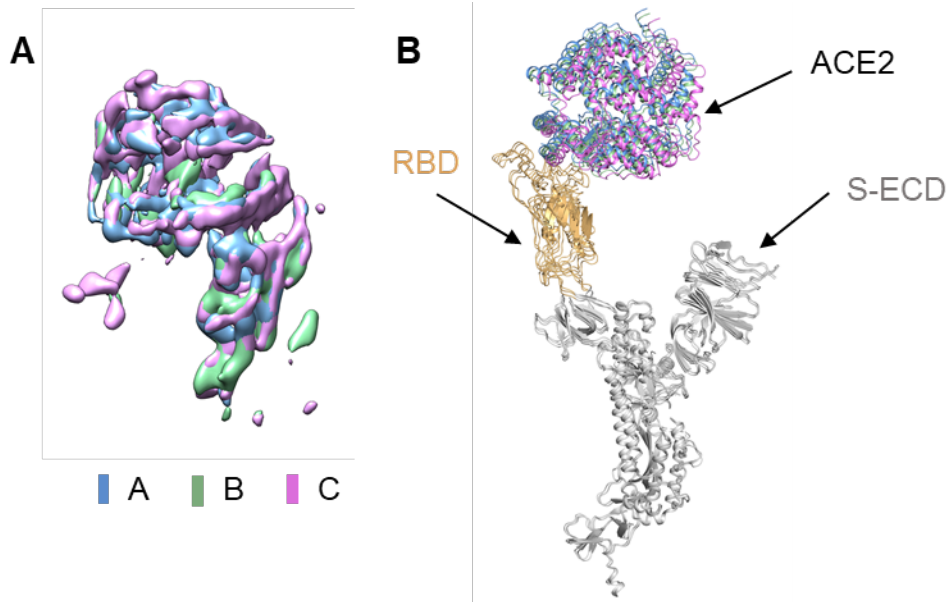

550

551 **Fig. S9.** Structural alignment of three protomer for S-ECD in complex ACE2. **(A)** Superposition  
552 in local map of RBD-ACE2 sub-complex for three protomer, which has no difference among  
553 three maps. The three ACE2 are colored blue, green and violet, respectively. **(B)** Structural  
554 alignment of three monomer of S-ECD in complex ACE2.

555

556

557

**Table S1**

558

**Cryo-EM data collection and refinement statistics.**

---

| <b>Data collection</b>                    |                                        |                                |
|-------------------------------------------|----------------------------------------|--------------------------------|
| EM equipment                              | Titan Krios (Thermo Fisher Scientific) |                                |
| Voltage (kV)                              | 300                                    |                                |
| Detector                                  | Gatan K3 Summit                        |                                |
| Energy filter                             | Gatan GIF Quantum, 20 eV slit          |                                |
| Pixel size (Å)                            | 1.087                                  |                                |
| Electron dose (e-/Å <sup>2</sup> )        | 50                                     |                                |
| Defocus range (µm)                        | -1.2 ~ -2.2                            |                                |
| Number of collected micrographs           | 1,197                                  |                                |
| Number of selected micrographs            | 1,153                                  |                                |
| Sample                                    | S-ECD_T-ACE2                           |                                |
| <b>3D Reconstruction</b>                  |                                        |                                |
|                                           | Whole model                            | Interface between RBD and ACE2 |
| Software                                  | cryoSPARC/ Relion                      | Relion                         |
| Number of used particles                  | 57,404                                 | 59,822                         |
| Resolution (Å)                            | 4.0                                    | 4.3                            |
| Symmetry                                  | C1                                     |                                |
| Map sharpening B factor (Å <sup>2</sup> ) | -90                                    |                                |
| <b>Refinement</b>                         |                                        |                                |
| Software                                  | Phenix                                 |                                |
| Cell dimensions (Å)                       | 313.056                                |                                |
| Model composition                         |                                        |                                |
| Protein residues                          | 4,804                                  |                                |
| Side chains assigned                      | 4,804                                  |                                |
| Sugar                                     | 104                                    |                                |
| R.m.s deviations                          |                                        |                                |
| Bonds length (Å)                          | 0.007                                  |                                |
| Bonds Angle (°)                           | 1.065                                  |                                |
| Ramachandran plot statistics (%)          |                                        |                                |

---

---

|           |       |
|-----------|-------|
| Preferred | 92.56 |
| Allowed   | 7.36  |
| Outlier   | 0.08  |

---

559  
560  
561  
562  
563  
564  
565  
566  
567  
568  
569  
570  
571  
572  
573  
574  
575  
576  
577  
578  
579  
580  
581  
582  
583  
584  
585  
586

587  
588  
589  
590  
591  
592  
593  
594  
595  
596  
597  
598  
599  
600  
601  
602  
603  
604  
605  
606  
607  
608  
609  
610  
611  
612  
613  
614  
615  
616  
617  
618  
619  
620  
621  
622  
623  
624  
625  
626  
627  
628  
629  
630  
631  
632

## References:

1. Zhou, P. et al. A pneumonia outbreak associated with a new coronavirus of probable bat origin. *Nature* **579**, 270-273 (2020).
2. Li, F., Li, W., Farzan, M. & Harrison, S.C. Structure of SARS coronavirus spike receptor-binding domain complexed with receptor. *Science* **309**, 1864-1868 (2005).
3. Wrapp, D. et al. Cryo-EM structure of the 2019-nCoV spike in the prefusion conformation. *Science* **367**, 1260-1263 (2020).
4. Beniac, D.R., Andonov, A., Grudeski, E. & Booth, T.F. Architecture of the SARS coronavirus prefusion spike. *Nat. Struct. Mol. Biol.* **13**, 751-752 (2006).
5. Li, W.H. et al. Angiotensin-converting enzyme 2 is a functional receptor for the SARS coronavirus. *Nature* **426**, 450-454 (2003).
6. Ju, B. et al. Human neutralizing antibodies elicited by SARS-CoV-2 infection. *Nature* **584**, 115-119 (2020).
7. Cao, Y. et al. Potent Neutralizing Antibodies against SARS-CoV-2 Identified by High-Throughput Single-Cell Sequencing of Convalescent Patients' B Cells. *Cell* **182**, 73-84 (2020).
8. Wu, Y. et al. A noncompeting pair of human neutralizing antibodies block COVID-19 virus binding to its receptor ACE2. *Science* **368**, 1274-1278 (2020).
9. Baum, A. et al. Antibody cocktail to SARS-CoV-2 spike protein prevents rapid mutational escape seen with individual antibodies. *Science* **369**, 1014-1018 (2020).
10. Hansen, J. et al. Studies in humanized mice and convalescent humans yield a SARS-CoV-2 antibody cocktail. *Science* **369**, 1010-1014 (2020).
11. Drake, J.W. & Holland, J.J. Mutation rates among RNA viruses. *Proc. Natl. Acad. Sci. U.S.A* **96**, 13910-13913 (1999).
12. Sanjuan, R., Nebot, M.R., Chirico, N., Mansky, L.M. & Belshaw, R. Viral mutation rates. *J. Virol.* **84**, 9733-9748 (2010).
13. Korber, B. et al. Tracking Changes in SARS-CoV-2 Spike: Evidence that D614G Increases Infectivity of the COVID-19 Virus. *Cell* **182**, 812-827 (2020).
14. Li, Q. et al. The Impact of Mutations in SARS-CoV-2 Spike on Viral Infectivity and Antigenicity. *Cell* 10.1016/j.cell.2020.07.012 (2020).
15. Weisblum, Y. et al. Escape from neutralizing antibodies by SARS-CoV-2 spike protein variants. <https://doi.org/10.1101/2020.07.21.214759>, (2020).
16. Ou, J. et al. Emergence of RBD mutations in circulating SARS-CoV-2 strains enhancing the structural stability and human ACE2 receptor affinity of the spike protein. <https://doi.org/10.1101/2020.03.15.991844>, (2020).
17. Kuba, K. et al. A crucial role of angiotensin converting enzyme 2 (ACE2) in SARS coronavirus-induced lung injury. *Nat. Med.* **11**, 875-879 (2005).
18. Glowacka, I. et al. Differential Downregulation of ACE2 by the Spike Proteins of Severe Acute Respiratory Syndrome Coronavirus and Human Coronavirus NL63. *J. Virol.* **84**, 1198-1205 (2010).
19. Liu, Y. et al. Clinical and biochemical indexes from 2019-nCoV infected patients linked to viral loads and lung injury. *Sci. China Life Sci.* **63**, 364-374 (2020).
20. Huang, F. et al. Angiotensin II plasma levels are linked to disease severity and predict fatal outcomes in H7N9-infected patients. *Nat. Commun.* **5**, 3595 (2014).
21. Imai, Y. et al. Angiotensin-converting enzyme 2 protects from severe acute lung failure. *Nature* **436**, 112-116 (2005).



- 633 22. Zou, Z. et al. Angiotensin-converting enzyme 2 protects from lethal avian influenza A  
634 H5N1 infections. *Nat. Commun.* **5**, 3594 (2014).
- 635 23. Khan, A. et al. A pilot clinical trial of recombinant human angiotensin-converting  
636 enzyme 2 in acute respiratory distress syndrome. *Crit. Care.* **21**, 234 (2017).
- 637 24. Hofmann, H. et al. Susceptibility to SARS coronavirus S protein-driven infection  
638 correlates with expression of angiotensin converting enzyme 2 and infection can be  
639 blocked by soluble receptor. *Biochem. Biophys. Res. Commun.* **319**, 1216-1221 (2004).
- 640 25. Lei, C. et al. Neutralization of SARS-CoV-2 spike pseudotyped virus by recombinant  
641 ACE2-Ig. *Nat. Commun.* **11**, 2070 (2020).
- 642 26. Monteil, V. et al. Inhibition of SARS-CoV-2 Infections in Engineered Human Tissues  
643 Using Clinical-Grade Soluble Human ACE2. *Cell* **181**, 905-913 (2020).
- 644 27. Lui, I. et al. Trimeric SARS-CoV-2 Spike interacts with dimeric ACE2 with limited intra-  
645 Spike avidity. <https://doi.org/10.1101/2020.05.21.109157> (2020).
- 646 28. Chan, K.K. et al. Engineering human ACE2 to optimize binding to the spike protein of  
647 SARS coronavirus 2. *Science* 10.1126/science.abc0870 (2020).
- 648 29. Li, Y. et al. Potential host range of multiple SARS-like coronaviruses and an improved  
649 ACE2-Fc variant that is potent against both SARS-CoV-2 and SARS-CoV-1.  
650 <https://doi.org/10.1101/2020.04.10.032342>, (2020).
- 651 30. Yang, X. et al. Highly stable trimers formed by human immunodeficiency virus type 1  
652 envelope glycoproteins fused with the trimeric motif of T4 bacteriophage fibritin. *J.*  
653 *Virology*. **76**, 4634-4642 (2002).
- 654 31. Meier, S., Guthe, S., Kiefhaber, T. & Grzesiek, S. Foldon, the natural trimerization  
655 domain of T4 fibritin, dissociates into a monomeric A-state form containing a stable beta-  
656 hairpin: atomic details of trimer dissociation and local beta-hairpin stability from residual  
657 dipolar couplings. *J. Mol. Biol.* **344**, 1051-1069 (2004).
- 658 32. Boice, J.A., Dieckmann, G.R., DeGrado, W.F. & Fairman, R. Thermodynamic analysis  
659 of a designed three-stranded coiled coil. *Biochemistry* **35**, 14480-14485 (1996).
- 660 33. Fletcher, J.M. et al. A basis set of de novo coiled-coil peptide oligomers for rational  
661 protein design and synthetic biology. *ACS Synth. Biol.* **1**, 240-250 (2012).
- 662 34. Kirchdoerfer, R.N. et al. Stabilized coronavirus spikes are resistant to conformational  
663 changes induced by receptor recognition or proteolysis. *Sci. Rep.* **8**, 15701 (2018).
- 664 35. Song, W., Gui, M., Wang, X. & Xiang, Y. Cryo-EM structure of the SARS coronavirus  
665 spike glycoprotein in complex with its host cell receptor ACE2. *PLoS Pathog.* **14**,  
666 e1007236 (2018).
- 667 36. Cai, Y. et al. Distinct conformational states of SARS-CoV-2 spike protein. *Science*  
668 10.1126/science.abd4251 (2020).
- 669 37. Walls, A.C. et al. Structure, Function, and Antigenicity of the SARS-CoV-2 Spike  
670 Glycoprotein. *Cell* **181**, 281-292 (2020).
- 671 38. Gui, M. et al. Cryo-electron microscopy structures of the SARS-CoV spike glycoprotein  
672 reveal a prerequisite conformational state for receptor binding. *Cell Res.* **27**, 119-129  
673 (2017).
- 674 39. Lin, Y. et al. Probing the structure of the SARS coronavirus using scanning electron  
675 microscopy. *Antivir. Ther.* **9**, 287-289 (2004).
- 676 40. Neuman, B.W. et al. Supramolecular architecture of severe acute respiratory syndrome  
677 coronavirus revealed by electron cryomicroscopy. *J. Virol.* **80**, 7918-7928 (2006).

- 678 41. Chen, X., Zaro, J.L. & Shen, W.C. Fusion protein linkers: property, design and  
679 functionality. *Adv. Drug Deliv. Rev.* **65**, 1357-1369 (2013).
- 680 42. Yan, R. et al. Structural basis for the recognition of SARS-CoV-2 by full-length human  
681 ACE2. *Science* **367**, 1444-1448 (2020).
- 682 43. Wang, Q.H. et al. Structural and Functional Basis of SARS-CoV-2 Entry by Using  
683 Human ACE2. *Cell* **181**, 894-904 (2020).
- 684 44. Zhou, T. et al. A pH-dependent switch mediates conformational masking of SARS-CoV-  
685 2 spike. <https://www.ncbi.nlm.nih.gov/pubmed/32637958> (2020).
- 686 45. C. Xu et al. Conformational dynamics of SARS-CoV-2 trimeric spike glycoprotein in  
687 complex with receptor ACE2 revealed by cryo-EM.  
688 <https://doi.org/10.1101/2020.06.30.177097>. (2020).
- 689 46. Strohl, W.R. Fusion Proteins for Half-Life Extension of Biologics as a Strategy to Make  
690 Biobetters. *Biodrugs* **29**, 215-239 (2015).
- 691 47. Glasgow, A. et al. Engineered ACE2 receptor traps potentially neutralize SARS-CoV-2.  
692 <https://doi.org/10.1101/2020.07.31.231746> (2020).
- 693 48. Wan, Y. et al. Molecular Mechanism for Antibody-Dependent Enhancement of  
694 Coronavirus Entry. *J. Virol.* **94**, (2020).
- 695 49. Arvin, A.M. et al. A perspective on potential antibody-dependent enhancement of SARS-  
696 CoV-2. *Nature* **584**, 353-363 (2020).
- 697 50. Bai, Y. & Shen, W.C. Improving the oral efficacy of recombinant granulocyte colony-  
698 stimulating factor and transferrin fusion protein by spacer optimization. *Pharm. Res.* **23**,  
699 2116-2121 (2006).
- 700 51. Sliepen, K., van Montfort, T., Melchers, M., Isik, G. & Sanders, R.W. Immunosilencing a  
701 highly immunogenic protein trimerization domain. *J. Biol. Chem.* **290**, 7436-7442 (2015).
- 702 52. Kuba, K., Imai, Y. & Penninger, J.M. Angiotensin-converting enzyme 2 in lung diseases.  
703 *Curr. Opin. Pharmacol.* **6**, 271-276 (2006).
- 704 53. Samavati, L. & Uhal, B.D. ACE2, Much More Than Just a Receptor for SARS-COV-2.  
705 *Front. Cell. Infect. Microbiol.* **10**, 317 (2020).
- 706 54. Xia, S. et al. A pan-coronavirus fusion inhibitor targeting the HR1 domain of human  
707 coronavirus spike. *Sci. Adv.* **5**, eaav4580 (2019).
- 708 55. Xia, S. et al. Inhibition of SARS-CoV-2 (previously 2019-nCoV) infection by a highly  
709 potent pan-coronavirus fusion inhibitor targeting its spike protein that harbors a high  
710 capacity to mediate membrane fusion. *Cell Res.* **30**, 343-355 (2020).
- 711 56. C. Gu et al. Potent antiviral effect of protoporphyrin IX and verteporfin on SARS-CoV-2  
712 infection. <https://doi.org/10.1101/2020.04.30.071290> (2020).
- 713 57. Chi, X. et al. A neutralizing human antibody binds to the N-terminal domain of the Spike  
714 protein of SARS-CoV-2. *Science*, 369, 650-655 (2020).
- 715 58. Lei, J. & Frank, J. Automated acquisition of cryo-electron micrographs for single particle  
716 reconstruction on an FEI Tecnai electron microscope. *J. Struct. Bio.* **150**, 69-80 (2005).
- 717 59. Zheng, S.Q. et al. MotionCor2: anisotropic correction of beam-induced motion for  
718 improved cryo-electron microscopy. *Nat. Methods* **14**, 331-332 (2017).
- 719 60. Grant, T. & Grigorieff, N. Measuring the optimal exposure for single particle cryo-EM  
720 using a 2.6 Å reconstruction of rotavirus VP6. *elife* **4**, e06980 (2015).
- 721 61. Zhang, K. Gctf: Real-time CTF determination and correction. *J. Struct. Bio.* **193**, 1-12  
722 (2016).

- 723 62. Zivanov, J. et al. New tools for automated high-resolution cryo-EM structure  
724 determination in RELION-3. *elife* **7**, e42166 (2018).
- 725 63. Kimanius, D., Forsberg, B.O., Scheres, S.H. & Lindahl, E. Accelerated cryo-EM  
726 structure determination with parallelisation using GPUs in RELION-2. *elife* **5**, e18722  
727 (2016).
- 728 64. Scheres, S.H. RELION: implementation of a Bayesian approach to cryo-EM structure  
729 determination. *J. Struc. Bio.* **180**, 519-530 (2012).
- 730 65. Scheres, S.H. A Bayesian view on cryo-EM structure determination. *J. Mol. Bio.* **415**,  
731 406-418 (2012).
- 732 66. Punjani, A., Rubinstein, J.L., Fleet, D.J. & Brubaker, M.A. cryoSPARC: algorithms for  
733 rapid unsupervised cryo-EM structure determination. *Nat. Methods* **14**, 290-296 (2017).
- 734 67. Rosenthal, P.B. & Henderson, R. Optimal determination of particle orientation, absolute  
735 hand, and contrast loss in single-particle electron cryomicroscopy. *J. Mol. Bio.* **333**, 721-  
736 745 (2003).
- 737 68. Chen, S. et al. High-resolution noise substitution to measure overfitting and validate  
738 resolution in 3D structure determination by single particle electron cryomicroscopy.  
739 *Ultramicroscopy* **135**, 24-35 (2013).
- 740 69. Trabuco, L.G., Villa, E., Mitra, K., Frank, J. & Schulten, K. Flexible fitting of atomic  
741 structures into electron microscopy maps using molecular dynamics. *Structure* **16**, 673-  
742 683 (2008).
- 743 70. Emsley, P., Lohkamp, B., Scott, W.G. & Cowtan, K. Features and development of Coot.  
744 *Acta Crystallogr. D.* **66**, 486-501 (2010).
- 745 71. Adams, P.D. et al. PHENIX: a comprehensive Python-based system for macromolecular  
746 structure solution. *Acta Crystallogr. D.* **66**, 213-221 (2010).
- 747
- 748
